# Supplementary material for: Monolayer NaW2O2Br6: a gate tunable near-infrared hyperbolic plasmonic surface
Source: Royal Society of Chemistry journal article supplement (doi:10.1039/d2na00292b), 2022-01-01
Supplement: d2na00292b1.pdf [file d2na00292b1.pdf]

## Supporting Information

### Gate tunable near Infrared hyperbolic properties in monolayer $\text{NaW}_2\text{O}_2\text{Br}_6$

*Enhui Huang<sup>1</sup>, Han Jiao<sup>1</sup>, Hui Xiang<sup>2</sup>, Xia Zhou<sup>1</sup>, Jiang Yin<sup>3</sup>, Wenying Zhong<sup>1,\*</sup>, Bo Xu<sup>1,\*</sup>*

This PDF file includes:

Figure. S1 to S3

Tables S1

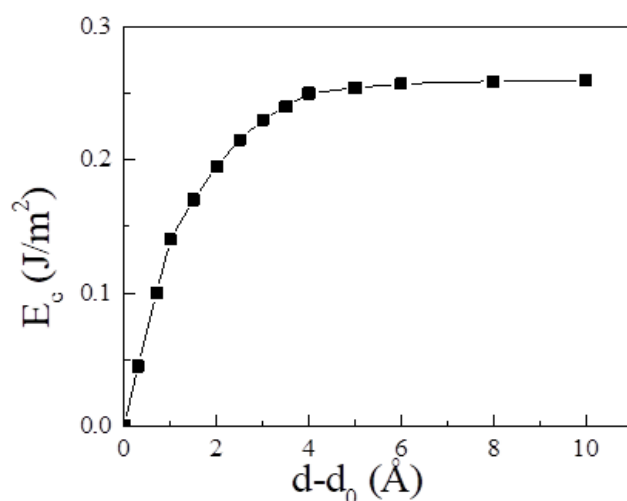

**Figure S1.** Calculated exfoliation energy vs separation distance for  $\text{NaW}_2\text{O}_2\text{Br}_6$  monolayer, where  $d_0$  indicates the van der Waals gap between adjacent layers in bulk crystal.

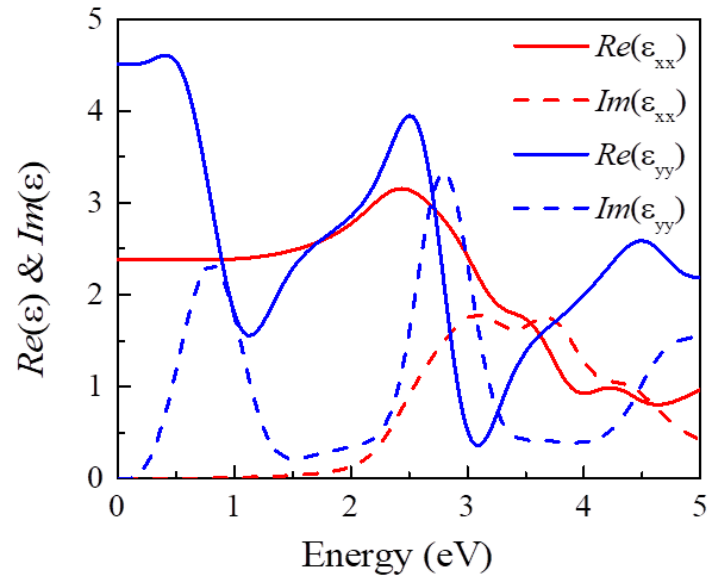

**Figure S2.** (The dielectric properties of monolayer  $\text{NaW}_2\text{O}_2\text{Br}_6$  contributed by the interband transitions.)

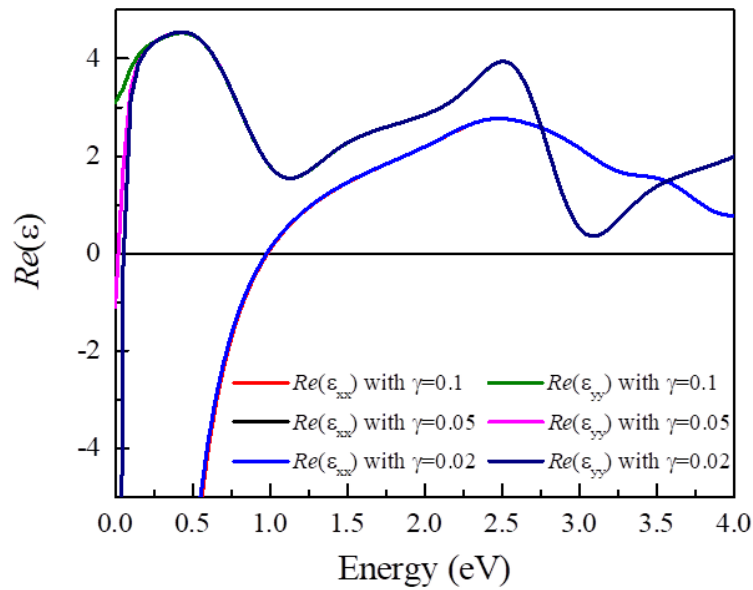

**Figure S3.** (The dielectric properties of monolayer  $\text{NaW}_2\text{O}_2\text{Br}_6$  with different  $\gamma$  ( $\gamma = 0.1, 0.05,$  and  $0.02$ )).)

**Table S1.** (Crystal structure of monolayer NaW<sub>2</sub>O<sub>2</sub>Br<sub>6</sub>)

---

| NaW <sub>2</sub> O <sub>2</sub> Br <sub>6</sub> |    |         |         |
|-------------------------------------------------|----|---------|---------|
| 1.0                                             |    |         |         |
| 3.813                                           |    | 0.000   | 0.000   |
| 0.000                                           |    | 10.499  | 0.000   |
| 0.000                                           |    | 0.000   | 26.010  |
| W                                               | Br | O       | Na      |
| 2                                               | 6  | 2       | 1       |
| 0.00000                                         |    | 0.13891 | 0.50000 |
| 0.00000                                         |    | 0.86109 | 0.50000 |
| 0.00000                                         |    | 1.00000 | 0.58027 |
| 0.00000                                         |    | 1.00000 | 0.41973 |
| 0.00000                                         |    | 0.32177 | 0.56598 |

---

---

|         |         |         |
|---------|---------|---------|
| 0.00000 | 0.67823 | 0.56598 |
| 0.00000 | 0.32177 | 0.43402 |
| 0.00000 | 0.67823 | 0.43402 |
| 0.00000 | 0.13826 | 0.50000 |
| 0.00000 | 0.86174 | 0.50000 |
| 0.00000 | 0.50000 | 0.50000 |

---
